# Supplementary material for: Molecular phylogenetics suggest Osmiopsis (Asteraceae) is a rare inter-subtribal hybrid genus on Hispaniola
Source: Research Square preprint supplement (doi:10.21203/rs.3.rs-6938723/v1), 2025-07-18
Supplement: Supplementary file 1 [file 05948074b226ff53380c8eb9.docx]

**Supplementary Table 2.** Protocol for the PCR reactions performed. Quantities of reagents are specified followed by specifications of the PCR cycles.

| **Reagent** | **ITS** | ***ndh*F** |
| --- | --- | --- |
| H2O  Buffer 10x  DMSO  BSA  ITS-4 & ITS-5  *ndh*F1212 & *ndh*F52  MgCl2  Taq  dNTP  DNA | 8µl  2µl  1,75µl  0  2.5 µl  0  1µl  0,25 µl  2µl  1µl | 11.5µl  2.5µl  0  1.25µl  0  2.5 µl  1µl  0,25 µl  2µl  1µl |
| **Total:** | **20**µ**l** | **25**µ**l** |
| **Protocol of the PCR Reactions** | | |
| **Cycles** | **ITS** | **ndhF** |
| **1** (1 x) | 94 °C/ 5:00 m | 95 °C /3:00 m |
| **2** (35 x) | 94 °C/ 00:45 s  50 °C/ 0:45 s  72 °C/ 1:00 m | 95 °C/ 0:30 s  54 °C/ 0:40 s  72 °C/ 1:00 m |
| **3** (1x) | 72 °C/ 10:00 m  4°C (∞) | 72 °C/ 5:00 m  4°C (∞) |
