# Supplementary material for: Molecular phylogenetics suggest Osmiopsis (Asteraceae) is a rare inter-subtribal hybrid genus on Hispaniola
Source: Research Square preprint supplement (doi:10.21203/rs.3.rs-6938723/v1), 2025-07-18
Supplement: Supplementary file 2 [file 528ee15ab9a677dd8c61ddd8.docx]

**Supplementary Table 3**

Intergeneric Asteraceae hybrids in the British Isles (adapted from Stace & al. 2015). Alien or native status follows POWO (2023).

| **Hybrid species** | **Parent genus 1** | **Parent genus 2** | **Morphology** |
| --- | --- | --- | --- |
| ***Conyzigeron bilboana* J. Rémy** | ***Conyza floribunda* Kunth**  **(Conyzinae; alien)**  **2n=54** | ***Erigeron acris* L.**  **(Conyzinae; native)**  **2n=18** | **Intermediate between parents** |
| ***Conyzigeron hulsenii* (Vatke) Rauschert**  **2n=18**  **sterile (Roper 1911)** | ***Conyza* *canadensis* (L.) Cronquist**  **(Conyzinae; alien)**  **2n=18** | ***Erigeron acris* L.**  **(Conyzinae; native)**  **2n=18** | **Intermediate between parents** |
| ***Conyzigeron* sp.**  **sterile** | ***Conyza sumatrensis* (Retz.) Walker**  **(Conyzinae; alien)**  **2n=54** | ***Erigeron acris* L.**  **(Conyzinae; native)**  **2n=18** | **Intermediate between parents** |
| ***Tripleurothemis maleolens* (P. Fourn) Stace**  **2n=18**  **highly sterile** | ***Anthemis cotula* (L.) Sch. Bip.**  **(Anthemidinae; native)**  **2n=18**  **90% SI** | ***Tripleurospermum inodorum* (L.) Sch. Bip.**  **(Anthemidinae; alien)**  **2n=18**  **90% SI** | **Intermediate between parents but less vigorous** |
