# Supplementary material for: Molecular phylogenetics suggest Osmiopsis (Asteraceae) is a rare inter-subtribal hybrid genus on Hispaniola
Source: Research Square preprint supplement (doi:10.21203/rs.3.rs-6938723/v1), 2025-07-18
Supplement: Supplementary file 3 [file dc4a89665b5b8218c801bbe0.xlsx]

## Sheet: Supplementary Table 1
Supplementary Table 1. Vouchers for molecular markers with Genbank accessions.
Subtribe	Species	Voucher specimen	Country	Major Division	Herb. / Ref.	ITS 1	ITS 2	ETS	ndhI	ndhI-ndhG	ndhF	ndhF-ycf1
Disynaphinae	Acanthostyles buniifolius (Hook. ex Arn.) R.M. King & H. Rob.	J.L. Panero & B. Crozier 8472	Argentina	Mendoza	TEX	KP454294	KP454447	KP454595	KP454160	KP454753	KP454883	KP454055
Ageratinae	Acritopappus catolesensis D.J.N. Hind & Bautista	V.L. Rivera 219	Brazil	Bahia	TEX	KP454295	KP454448	KP454596	KP454161	KP454754	KP454884	KP454056
Ageratinae	Acritopappus confertus (Gardner) R.M. King & H. Rob.	V.L. Rivera 121	Brazil	Bahia	TEX	KP454296	KP454449	KP454597	KP454162	KP454755	KP454885	KP454057
Ageratinae	Acritopappus connatifolius (Soares Nunes) R.M. King & H. Rob.	Bautista (2000)	Brazil	Bahia?	HRB/SANT	Bautista (2000)	Bautista (2000)	NS	NS	NS	NS	NS
Ageratinae	Acritopappus diamantinicus H. Bautista	S. Ortiz & Rodr. Oubiña, Bautista (2000)	Brazil	Bahia	HRB/SANT	Bautista (2000)	Bautista (2000)	NS	NS	NS	NS	NS
Ageratinae	Acritopappus heterolepis (Baker) R.M. King & H. Rob.	M.D. de Moraes 730	Brazil	Bahia	TEX	KP454297	KP454450	KP454598	KP454163	KP454756	KP454886	KP454058
Ageratinae	Acritopappus longifolius (Gardner) R.M. King & H. Rob.	V.L. Rivera 163	Brazil	Minas Gerais	TEX	KP454298	KP454451	KP454599	KP454164	KP454757	KP454887	KP454059
Ageratinae	Acritopappus micropappus (Baker) R.M. King & H. Rob.	J.L. Ferreira 161	Brazil	Bahia	TEX	KP454299	KP454452	KP454600	KP454165	KP454758	NS	NS
Ageratinae	Acritopappus pereirae H. Bautista	S. Ortiz & R.M. R. Oubiña fide Bautista (2000)	Brazil	Minas Gerais	HRB/SANT	Bautista (2000)	Bautista (2000)	NS	NS	NS	NS	NS
Ageratinae	Acritopappus subtomentosus King & H. Rob.	J.B.Bringel 902	Brazil	Minas Gerais	UB	KP454300	KP454453	KP454601	KP454166	KP454759	KP454888	KP454060
Ageratinae	Acritopappus teixeirae R.M. King & H. Rob.	Bautista (2000)	Brazil	Bahia?	HRB/SANT	Bautista (2000)	Bautista (2000)	NS	NS	NS	NS	NS
Adenostemmatinae	Adenostemma involucratum R.M. King & H. Rob.	M.D. de Moraes 679	Brazil	Minas Gerais	TEX	KJ637168	KJ637168	KP454602	NS	NS	KP454889	KP454061
Ageratinae	Ageratum conyzoides L.	J.L. Panero 8827	Mexico	Nayrit	TENN	KP454301	KP454454	KP454603	KP454167	KP454760	KP454890	KP454062
Ageratinae	Ageratum fastigiatum (Gardner) R.M. King & H. Rob.	V.L. Rivera 91	Brazil	Distrito Federal	TEX	KP454302	KP454455	KP454604	KP454168	KP454761	KP454891	KP454063
Ageratinae	Ageratum houstonianum Miller	E.E. Schilling 04-24	USA	Tennessee (cultivated)	TENN	AF177789	AF177829	NS	KP454169	KP454762	EU337042	NS
Gyptidinae	Agrianthus carvalhoi D.J.N. Hind	V.L. Rivera 136.1	Brazil	Bahia	TEX	KP454303	KP454456	KP454605	KP454170	KP454763	KP454892	KP454064
Gyptidinae	Agrianthus empetrifolius Mart. ex DC.	V.L. Rivera 117	Brazil	Bahia	TEX	KP454304	KP454457	KP454606	NS	NS	NS	NS
Gyptidinae	Agrianthus giuliettiae D.J.N. Hind	V.L. Rivera 136.2	Brazil	Bahia	TEX	KP454305	KP454458	KP454607	KP454171	KP454764	KP454893	KP454065
Gyptidinae	Agrianthus luetzelburgii Mattf.	V.L. Rivera 139	Brazil	Bahia	TEX	KP454306	KP454459	KP454608	KP454172	KP454765	KP454894	KP454066
Alomiinae	Alomia ageratoides Kunth	J.L. Panero & Schilling 8861	Mexico	Guerrero	TEX	KP454307	KP454460	KP454609	KP454173	KP454766	KP454895	NS
Alomiinae	Alomiella regnellii (Malme) R.M. King & H. Rob.	N.F.O. Mota 2120	Brazil	Mato Grosso	BHCB	Fernandes (2014)	Fernandes (2014)	NS	NS	NS	NS	NS
Gyptidinae	Arrojadocharis praxeloides (Mattf.) Mattf.	M.D. de Moraes 726	Brazil	Bahia	TEX	KP454308	KP454461	KP454610	KP454174	KP454767	KP454896	KP454067
Gyptidinae	Arrojadocharis santosii R.M. King & H. Rob.	A.M. de Carvalho 6646	Brazil	Bahia	NY	KP454309	KP454462	KP454611	NS	NS	KP454897	NS
Alomiinae	Austrobrickellia patens (D. Don ex. Hook. & Arn.) R.M. King & H. Rob.	J.L. Panero & B. Crozier 8469	Argentina	Mendoza	TENN	KP454310	KP454463	KP454612	KP454175	KP454768	KP454898	KP454068
Eupatoriinae	Austroeupatorium inulifolium (Kunth) R.M. King & H. Rob.	J.L. Panero & B. Crozier 8516	Argentina	Santiago del Estero	TENN	KP454311	KP454464	KP454613	KP454176	KP454769	KP454899	KP454069
Eupatoriinae	Austroeupatorium laetevirens (Hook. & Arn.) R.M. King & H. Rob.	R. Wasum 1023	Brazil	Rio Grande do Sul	MICH	KP454312	KP454465	KP454614	KP454177	KP454770	KP454900	KP454070
Eupatoriinae	Austroeupatorium picturatum (Malme) R.M. King & H. Rob.	G. Hatschbach 44925	Brazil	Paraná	MICH	KP454313	KP454466	KP454615	NS	NS	NS	NS
Ayapaninae	Ayapana amygdalina (Lam.) R.M. King & H. Rob.	M.D. de Moraes 759	Brazil	Minas Gerais	TEX	KP454314	KP454467	KP454616	KP454178	KP454771	KP454901	KP454071
Ayapaninae	Ayapana lanceolata R.M. King & H. Rob.	J.J. Strudwick 3907	Brazil	Pará	NY	KP454315	KP454468	KP454617	KP454179	KP454772	NS	NS
Ayapaninae	Ayapanopsis oblongifolia (Gardner) R.M. King & H. Rob.	R. Harley 25786	Brazil	Bahia	UB	KP454316	KP454469	KP454618	NS	NS	NS	NS
Gyptidinae	Bahianthus viscosus ((Spreng.) R.M. King & H. Rob.	M.D. de Moraes 737	Brazil	Bahia	TEX	KP454317	KP454470	KP454619	KP454180	KP454773	KP454902	KP454072
Gyptidinae	Barrosoa betoniciformis (DC.) R.M. King & H. Rob.	M.D. de Moraes 814	Brazil	Paraná	TEX	KP454318	KP454471	KP454620	KP454181	KP454774	KP454903	KP454073
Gyptidinae	Barrosoa candolleana (Hook. & Arn.) R.M. King & H. Rob.	J.L. Panero & B. Crozier 8533	Argentina	Corrientes	TENN	KP454319	KP454472	KP454621	KP454182	KP454775	KP454904	KP454074
Hebecliniinae	Bartlettina oresbia (B. L. Rob.) R.M. King & H. Rob.	J.L. Panero 5523	Mexico	Oaxaca	TEX	KP454320	KP454473	KP454622	KP454183	KP454776	KP454905	NS
Hebecliniinae	Bartlettina sordida (Less.) R.M. King & H. Rob.	J.L. Panero 2762	Mexico	Oaxaca	TEX	NS	NS	KP454623	KP454184	KP454777	KP454906	NS
Gyptidinae	Bejaranoa balansae (Hieron.) R.M. King & H. Rob.	J.L. Panero 8517	Argentina	Santiago del Estero	TENN	KP454321	KP454474	KP454624	KP454185	KP454778	NS	NS
Gyptidinae	Bejaranoa semistriata (Baker) R.M. King & H. Rob.	M.D. de Moraes 722	Brazil	Bahia	TEX	KP454322	KP454475	KP454625	KP454186	KP454779	KP454907	KP454075
Gyptidinae	Bishopiella elegans R.M. King & H. Rob.	M.D. de Moraes 710	Brazil	Bahia	TEX	KP454323	KP454476	KP454626	KP454187	KP454780	KP454908	KP454076
Alomiinae	Brickellia coulteri A. Gray	J.L.Panero 2836	Mexico	Baja Califlornia Sur	TENN	KP454324	KP454477	KP454627	KP454188	KP454781	KP454909	NS
Alomiinae	Brickellia diffusa (Vahl) A. Gray	V.L. Rivera 210	Brazil	Distrito Federal	TEX	KP454325	KP454478	KP454628	KP454189	KP454782	KP454910	KP454077
Alomiinae	Brickellia filipes B. L. Rob.	J.L.Panero & Schilling 8843	Mexico	Jalisco	TEX	KM668947	KM668947	KM669046	KP454190	KP454783	KP454911	KP454078
Disynaphinae	Campovassouria cruciata (Vell.) R.M. King & H. Rob.	M.D. de Moraes 675	Brazil	São Paulo	TEX	KP454326	KP454479	KP454629	KP454191	KP454784	KP454912	KP454079
Gyptidinae	Campuloclinium campuloclinioides (Baker) R.M. King & H. Rob.	H.S. Irwin 22823	Brazil	Minas Gerais	UB	KP454327	KP454480	NS	NS	NS	NS	NS
Gyptidinae	Campuloclinium chlorolepis (Baker) R.M. King & H. Rob.	N.P. Lopes 146	Brazil	Minas Gerais	TENN	KP454328	KP454481	KP454630	KP454192	KP454785	KP454913	KP454080
Gyptidinae	Campuloclinium hirsutum Gardner	M.D. de Moraes 720	Brazil	Minas Gerais	TEX	KP454329	KP454482	KP454631	KP454193	KP454786	KP454914	KP454081
Gyptidinae	Campuloclinium macrocephalum (Less.) DC.	R. Wasum 5459	Brazil	Rio Grande do Sul	MICH	KP454330	KP454483	NS	KP454194	KP454787	KP454915	KP454082
Gyptidinae	Campuloclinium megacephalum (Mart. ex Baker) R.M. King & H. Rob.	V.L. Rivera 145	Brazil	Goiás	TEX	KP454331	KP454484	KP454632	KP454195	KP454788	KP454916	NS
Gyptidinae	Catolesia huperzioides Roque, H.Rob. & A.A. Conceição	A.A. Conceição 1179	Brazil	Bahia	HUEFS	KP454332	NS	KP454633	KP454196	KP454789	NS	NS
Gyptidinae	Catolesia mentions D.J.N. Hind	S.C. Ferreira 360	Brazil	Bahia	HUEFS	KP454333	KP454485	KP454634	NS	NS	KP454917	NS
Ageratinae	Cavalcantia glomerata (G.M. Barroso & R.M. King) R.M. King & H. Rob.	R.S. Secco 142	Brazil	Pará	NY	NS	NS	KP454635	NS	NS	NS	NS
Critoniinae	Chacoa pseudoprasiifolia (Hassl.) R.M. King & H. Rob.	T.M. Pedersen 5070	Argentina	Corrientes	NY	KP454334	KP454486	KP454636	NS	NS	NS	NS
Praxelinae	Chromolaena alvimii R.M. King & H. Rob.	M.D. de Moraes 711	Brazil	Bahia	TEX	KP454335	KP454487	KP454637	KP454197	KP454790	KP454918	KP454083
Praxelinae	Chromolaena arrayana (Gardner) R.M. King & H. Rob.	J.B. Bringel 935	Brazil	Goiás	UB	KP454336	KP454488	KP454638	NS	NS	NS	NS
Praxelinae	Chromolaena borinquensis (Britton) R.M. King & H. Rob.	Barker et al. 2005	Puerto Rico	no major division	TEX	AY576844.1	AY576844.1	NS	NS	NS	NS	NS
Praxelinae	Chromolaena cf. ascendens (Sch. Bip ex Baker) R.M. King & H. Rob.	A.L.Christ 622	Brazil	Santa Catarina	ICN	NS	NS	in submission	in submission	in submission	in submission	in submission
Praxelinae	Chromolaena christieana (Baker) R.M. King & H. Rob.	A.L.Christ 526	Brazil	Rio Grande do Sul	ICN, HUFU	NS	NS	in submission	in submission	in submission	in submission	in submission
Praxelinae	Chromolaena collina (DC.) R.M. King & H. Rob.	T.R. van Devender 97-1485	Mexico	Sonora	TEX 00115225	AY576855.1	AY576855.1	NS	NS	NS	NS	NS
Praxelinae	Chromolaena congesta (Hook. & Arn.) R.M. King & H. Rob.	A.L.Christ 483	Brazil	Rio Grande do Sul	ICN	NS	NS	in submission	in submission	in submission	in submission	in submission
Praxelinae	Chromolaena decumbens Gardner	M.D. Moraes 699	Brazil	Minas Gerais	TEX	KP454409	KP454558	KP454712	KP454260	KP454850	KP454976	KP454133
Praxelinae	Chromolaena gentianoides (B. L. Rob.) (DC.) R.M. King & H. Rob.	A.L.Christ 600	Brazil	Santa Catarina	ICN	NS	NS	in submission	in submission	in submission	in submission	in submission
Praxelinae	Chromolaena hirsuta (Hook & Arn.) R.M. King & H. Rob.	A.L.Christ 494	Brazil	Rio Grande do Sul	ICN	NS	NS	in submission	in submission	in submission	in submission	in submission
Praxelinae	Chromolaena horminoides DC	S.C.Ferreira 346	Brazil	Bahia	HUEFS	KP901193.1	KP901193.1	NS	NS	NS	NS	NS
Praxelinae	Chromolaena laevigata (Lam.) R.M. King & H. Rob.	N.P. Lopes 125	Brazil	Minas Gerais	TENN	KP454337	KP454489	KP454639	KP454198	KP454791	KP454919	KP454084
Praxelinae	Chromolaena latisquamulosa (Hieron) R.M. King & H. Rob.	A.L.Christ 502	Brazil	Rio Grande do Sul	ICN	NS	NS	in submission	in submission	in submission	in submission	in submission
Praxelinae	Chromolaena leucocephala Gardner	R.N. Ribeiro 620	Brazil	Goiás	UB	in submission	in submission	NS	NS	NS	NS	NS
Praxelinae	Chromolaena maximilianii (Schrad. ex DC.) R.M. King & H. Rob.	R.N. Ribeiro 621	Brazil	Goiás	UB	in submission	in submission	NS	NS	NS	NS	NS
Praxelinae	Chromolaena morii R.M. King & H. Rob.	V.L. Rivera 118	Brazil	Bahia	TEX	KP454338	KP454490	KP454640	KP454199	KP454792	KP454920	KP454085
Praxelinae	Chromolaena odorata (L.) R.M. King & H. Rob.	J.L. Panero 2004-2	Mexico	Nuevo Leon	TEX	KP454339	KP454491	KP454641	KP454200	KP454793	KP454921	KP454086
Praxelinae	Chromolaena pseudinsignis R.M. King & H. Rob.	V.L. Rivera 152	Brazil	Goiás	TEX	NS	NS	KP454642	NS	NS	KP454922	NS
Praxelinae	Chromolaena rhinanthacea (DC.) R.M. King & H. Rob.	A.L.Christ 480	Brazil	Rio Grande do Sul	ICN	NS	NS	in submission	in submission	in submission	in submission	in submission
Praxelinae	Chromolaena squalida (DC.) R.M. King & H. Rob	R.N. Ribeiro 603	Brazil	Goiás	UB	in submission	in submission	NS	NS	NS	NS	NS
Praxelinae	Chromolaena stachyophylla (Spreng.) R.M. King & H. Rob.	M.D. de Moraes 767	Brazil	Minas Gerais	TEX	KP454340	KP454492	KP454644	KP454202	KP454795	KP454924	KP454088
Gyptidinae	Conocliniopsis prasiifolia (DC.) R.M. King & H. Rob.	M.D. de Moraes 701	Brazil	Minas Gerais	TEX	KP454341	KP454493	KP454645	KP454203	KP454796	KP454925	KP454089
Critoniinae	Critonia hebebotrya DC.	J.L. Panero & E.E. Schilling 8852	Mexico	Jalisco	TEX	KP454342	KP454494	KP454646	NS	NS	NS	NS
Critoniinae	Critonia morifolia (Mill.) R.M. King & H. Rob.	G. Hatschbach 19801	Brazil	Paraná	MICH	KP454343	KP454495	KP454647	KP454204	KP454797	NS	NS
Critoniinae	Critonia quadrangularis (DC.) R.M. King & H. Rob.	J.L. Panero & E.E. Schilling 8825	Mexico	Nayrit	TEX	KP454344	KP454496	KP454648	KP454205	KP454798	KP454926	KP454090
Critoniinae	Critonia sexangularis (Klatt) R.M. King & H. Rob.	J.L. Panero & Campos 2770	Mexico	Totontepec	TEX	KJ637169	KJ637169	KP454649	KP454206	KP454799	EU337039	NS
Gyptidinae	Dasycondylus resinosus (Spreng.) R.M. King & H. Rob.	R.L. Esteves 2283	Brazil	Rio de Janeiro	HUEFS	KP901161.1	KP901161.1	NS	NS	NS	NS	NS
Gyptidinae	Diacranthera crenata (Schltdl. ex Mart.) R.M. King & H. Rob.	E. de Melo 3010	Brazil	Bahia	HUEFS	KP454345	KP454497	KP454650	NS	NS	NS	NS
Gyptidinae	Diacranthera ulei R.M. King & H. Rob.	A.M. Miranda 5148	Brazil	Bahia	HUEFS	KP454346	NS	KP454651	NS	NS	NS	NS
Alomiinae	Dissothrix imbricata (Gardner) B.L. Rob.	F.S. Araújo 1467	Brazil	Ceará	HUEFS	KP454347	KP454498	KP454652	NS	NS	NS	NS
Disynaphinae	Disynaphia ligulifolia (Hook. & Arn.) R.M. King & H. Rob.	G. Hatschbach 23944	Brazil	Paraná	MICH	KP454348	NS	KP454653	NS	NS	NS	NS
Disynaphinae	Disynaphia littoralis (Cabrera) R.M. King & H. Rob.	R.F. Vieira 313	Brazil	Paraná	TEX	NS	NS	KP454654	NS	NS	NS	NS
Disynaphinae	Disynaphia multicrenulata (Sch. Bip. ex Baker) R.M. King & H. Rob.	R. Vanni 4593	Argentina	Misiones	TEX	KP454349	KP454499	KP454655	KP454207	KP454800	KP454927	NS
Disynaphinae	Disynaphia praeficta (B.L. Rob.) R.M. King & H. Rob.	E. Guarçoni 1959	Brazil	Minas Gerais	TEX	KP454350	KP454500	KP454656	KP454208	KP454801	KP454928	KP454091
Disynaphinae	Disynaphia spathulata (Hook. & Arn.) R.M. King & H. Rob.	V.L. Rivera 96, 148	Brazil	Goiás	TEX	NS	NS	KP454657	KP454209	KP454802	KP454929	KP454092
Praxelinae	Eitenia polyseta R.M. King & H. Rob.	H.S. Irwin 15645	Brazil	Distrito Federal	UB	KP454351	KP454501	NS	NS	NS	NS	NS
Praxelinae	Eitenia praxelioides R.M. King & H. Rob.	M.F. Simon 2874	Brazil	Maranhão	HUFU	in submission	in submission	NS	NS	NS	in submission	in submission
Praxelinae	Eupatoriopsis hoffmanniana Hieron	J.P.L. Braga 800	Brazil	Minas Gerais	AFR, UB	in submission	in submission	NS	NS	NS	in submission	in submission
Eupatoriinae	Eupatorium hyssopifolium L.	Siripun 02-Eup-157	USA	North Carolina	TENN	AF177812	AF177852	HQ416395	HQ416237	HQ416237	EU337035	NS
Fleischmanniina	Fleischmannia capillipes (Benth.) R.M. King & H. Rob.	J.L. Panero & E.E. Schilling 8859	Mexico	Guerrero	TEX	KP454352	KP454502	KP454658	KP454210	KP454803	KP454930	KP454093
Fleischmanniina	Fleischmannia incarnata (Walter) R.M. King & H. Rob.	E.E. Schilling 95-21	USA	unknown	TENN	AF177788	AF177828	KP454659	KP454211	KP454804	EU337043	NS
Fleischmanniina	Fleischmannia laxa (Gardner) R.M. King & H. Rob.	V.L. Rivera 199	Brazil	Distrito Federal	TEX	KP454353	KP454503	KP454660	KP454212	KP454805	KP454931	KP454094
Fleischmanniina	Fleischmannia remotifolia (DC.) R.M. King & H. Rob.	M.D. de Moraes 758	Brazil	Rio de Janeiro	TEX	KP454354	KP454504	NS	KP454213	KP454806	KP454932	KP454095
Fleischmanniina	Fleischmannia sonorae (A. Gray) R.M. King & H. Rob.	J.L. Panero & E.E. Schilling 8821	Mexico	Zacatecas	TEX	KP454355	KP454505	KP454661	KP454214	KP454807	KP454933	KP454096
Perityleae	Galeana pratensis (Kunth) Rydb.	B. Baldwin 980	Mexico	Mexico	UC	AF374873	AF374873	KP454662	AF383791	AF383666	AF384726	NS
Ageratinae	Gardnerina angustata (Gardner) R.M. King & H. Rob.	P.H.A. Melo 4422	Brazil	Minas Gerais	TEX	KP454356	KP454506	KP454663	KP454215	KP454808	KP454934	NS
Alomiinae	Goyazianthus tetrastichus (B.L. Rob.) R.M. King & H. Rob.	V.L. Rivera 97	Brazil	Distrito Federal	TEX	KP454357	KP454507	KP454664	KP454216	KP454809	KP454935	KP454097
Disynaphinae	Grazielia bishopii R.M. King & H. Rob.	V.L. Rivera 153	Brazil	Goiás	TEX	KP454358	KP454508	KP454665	KP454217	KP454810	KP454936	NS
Disynaphinae	Grazielia dimorpholepis (Baker) R.M. King & H. Rob.	M.D. de Moraes 718	Brazil	Minas Gerais	TEX	KP454359	KP454509	KP454666	KP454218	KP454811	KP454937	KP454098
Disynaphinae	Grazielia intermedia (DC.) R.M. King & H. Rob.	G. Hatschbach 50897	Brazil	Paraná	MICH	KP454360	KP454510	KP454667	KP454219	KP454812	NS	NS
Disynaphinae	Grazielia multifida (DC.) R.M. King & H. Rob.	J.M. Cruz 65	Brazil	Paraná	UB	KP454361	KP454511	KP454668	KP454220	KP454813	KP454938	NS
Disynaphinae	Grazielia serrata (Spreng.) R.M. King & H. Rob.	G. Hatschbach 28238	Brazil	Paraná	MICH	KP454362	KP454512	NS	NS	NS	NS	NS
Hebecliniinae	Guayania cerasifolia (Sch. Bip. ex Baker) R.M. King & H. Rob.	M.L. Kawasaki 124	Brazil	Amazonas	NY	KP454363	KP454513	KP454669	KP454221	KP454814	KP454939	NS
Hebecliniinae	Guayania roupalifolia (B.L. Rob.) R.M. King & H. Rob.	B. Maguire 60491	Brazil	Amapá	NY	NS	NS	KP454670	NS	NS	NS	NS
Adenostemmatinae	Gymnocoronis spilanthoides (D. Don ex Hook. & Arn.) DC.	J.L. Panero & B. Crozier 8370	Argentina	Buenos Aires	TENN	KJ637170	KJ637170	NS	KP454222	KP454815	KP454940	KP454099
Gyptidinae	Gyptis pinnatifida Cass.	M.D. de Moraes 793	Brazil	Santa Catarina	TEX	KP454364	KP454514	KP454671	KP454223	KP454816	KP454941	KP454100
Gyptidinae	Gyptis tanacetifolia (Gilles ex Hook. & Arn.) D.J.N. Hind. & Flann	J.L. Panero & B. Crozier 8378	Argentina	Buenos Aires	TENN	KP454365	KP454515	KP454672	KP454224	KP454817	KP454942	KP454101
Eupatoriinae	Hatschbachiella polyclada (Dusen ex Malme) R.M. King & H. Rob.	J.M. Silva 506	Brazil	Paraná	MICH	KP454366	KP454516	KP454673	NS	NS	NS	NS
Eupatoriinae	Hatschbachiella tweedieana (Hook. & Arn.) R.M. King & H. Rob.	J.L. Panero & B. Crozier 8381	Argentina	Buenos Aires	TENN	KP454367	KP454517	KP454674	KP454225	KP454818	KP454943	KP454102
Hebecliniinae	Hebeclinium macrophyllum (L.) DC.	J.M. Poole 1437	Mexico	Veracruz	TEX	KP454368	KP454518	KP454675	NS	NS	KP454944	KP454103
Ayapaninae	Heterocondylus alatus (Vell.) R.M. King & H. Rob.	M.D. de Moraes 757	Brazil	Rio de Janeiro	TEX	KP454369	KP454519	KP454676	KP454226	KP454819	KP454945	KP454104
Ayapaninae	Heterocondylus pumilus (Gardner) R.M. King & H. Rob.	M.D. de Moraes 715	Brazil	Minas Gerais	TEX	KP454370	KP454520	KP454677	KP454227	KP454820	KP454946	KP454105
Ayapaninae	Heterocondylus vitalbae (DC.) R.M. King & H. Rob.	J.G. Jardim 3729	Brazil	Bahia	NY	KP454371	KP454521	KP454678	NS	NS	NS	NS
Critoniinae	Idiothamnus lilloi (B.L. Rob.) R.M. King & H. Rob.	J.L. Panero & B. Crozier 8511	Argentina	Salta	TENN	KP454372	KP454522	KP454679	KP454228	KP454821	KP454947	KP454106
Critoniinae	Imeria memorabilis (Maguire & Wurdack) R.M. King & H. Rob.	V. Funk 6404	Venezuela	Amazonas	TEX	KP454373	KP454523	KP454680	NS	NS	NS	NS
Ayapaninae	Isocarpha oppositifolia (L.) Cass.	J.L. Panero 2004-1	Mexico	unknown	TEX	KJ637171	KJ637171	KP454681	KP454229	KP454822	KP454948	KP454107
Oxylobinae	Kaunia lasiophthalma (Griseb.) R.M. King & H. Rob.	J.L. Panero & B. Crozier 8489	Argentina	unknown	TENN	KP454374	KP454524	KP454682	KP454230	KP454823	KP454949	KP454108
Oxylobinae	Kaunia rufescens (P.W. Lund ex DC.) R.M. King & H. Rob.	M.D. de Moraes 766	Brazil	São Paulo	TEX	KP454375	KP454525	KP454683	KP454231	NS	KP454950	KP454109
Oxylobinae	Kaunia saltensis (Hieron.) R.M. King & H. Rob.	J.L. Panero & B. Crozier 8494	Argentina	unknown	TENN	KP454376	KP454526	KP454684	KP454232	KP454824	KP454951	KP454110
Critoniinae	Koanophyllon adamantium (Gardner) R.M. King & H. Rob.	V.L. Rivera 161	Brazil	Minas Gerais	TEX	KP454377	KP454527	KP454685	NS	NS	KP454952	KP454111
Critoniinae	Koanophyllon ayapanoides (Griseb.) R.M. King & H. Rob.	Bennet 7582	Cuba	no major division	FTG	KJ637172	KJ637172	KP454686	KP454233	KP454825	EU337038	NS
Critoniinae	Koanophyllon palmeri (A. Gray) R.M. King & H. Rob.	J.L. Panero & E.E. Schilling 8839	Mexico	Jalisco	TEX	KP454378	KP454528	KP454687	KP454234	NS	KP454953	KP454112
Critoniinae	Koanophyllon polystictum (Urb.) R.M. King & H. Rob.	Bennet 7578	Cuba	no major division	FTG	KP454379	KP454529	KP454688	KP454235	KP454826	KP454954	KP454113
Critoniinae	Koanophyllon tinctorium Arruda	Y. Mexia 4655	Brazil	Minas Gerais	MICH	KP454380	KP454530	NS	KP454236	KP454827	NS	NS
Critoniinae	Koanophyllon villosum (Sw.) R.M. King & H. Rob.	Hite s.n.	Cayman Islands	no major division	TENN	KP454381	KP454531	KP454689	KP454237	KP454828	KP454955	KP454114
	Koanoxelis plumieri (Urb. & Ekmnan) R. Neves-Ribeiro & V.L. Rivera	E.L. Ekman 6490	Haiti	no major division	LL	in submission	in submission	NS	NS	NS	in submission	in submission
Gyptidinae	Lasiolaena carvalhoi D.J.N. Hind	W. Ganev 901	Brazil	Bahia	NY	KP454382	KP454532	KP454690	KP454238	KP454829	NS	NS
Gyptidinae	Lasiolaena duartei R.M. King & H. Rob.	V.L. Rivera 122	Brazil	Bahia	TEX	KP454383	KP454533	KP454691	KP454239	KP454830	KP454956	KP454115
Gyptidinae	Lasiolaena lychnophorioides Roque, S.C. Ferreira & H. Rob.	E.C. Oliveira 106	Brazil	Bahia	TEX	KP454384	KP454534	KP454692	NS	NS	NS	NS
Gyptidinae	Lasiolaena morii R.M. King & H. Rob.	M.D. de Moraes 736	Brazil	Bahia	TEX	KP454385	KP454535	KP454693	KP454240	KP454831	KP454957	KP454116
Alomiinae	Leptoclinium trichotomum (Gardner) Benth.	V.L. Rivera 87	Brazil	Goiás	TEX	KP454386	KP454536	KP454694	KP454241	KP454832	KP454958	KP454117
Gyptidinae	Litothamnus ellipticus R.M. King & H. Rob.	M.D. de Moraes 705	Brazil	Bahia	TEX	KP454387	KP454537	KP454695	KP454242	KP454833	KP454959	KP454118
Gyptidinae	Litothamnus nitidus (DC.) W.C Holmes	A.M. Amorim 3526	Brazil	Bahia	NY	KP454388	KP454538	NS	NS	NS	NS	NS
Praxelinae	Lomatozona artemisiifolia Baker	H.S. Irwin 11786	Brazil	Goiás	NY	KP454389	KP454539	NS	NS	NS	NS	NS
Praxelinae	Lomatozona huntii R.M. King & H. Rob.	H.S. Irwin 17271	Brazil	Mato Grosso	NY	KP454390	NS	NS	KP454243	KP454834	NS	NS
Eupatoriinae	Macropodina blumenavii (Hieron.) R.M. King & H. Rob.	W. Hahn 2043	Paraguay	Alto Paraná	NY	KP454391	KP454540	KP454696	NS	NS	NS	NS
Critoniinae	Malmeanthus subintegerrimus (Malme) R.M. King & H. Rob.	A. Krapovickas 17100	Argentina	Corrientes	TEX	KP454392	KP454541	NS	NS	NS	NS	NS
Mikaniinae	Mikania goyazensis (B.L. Rob.) R.M. King & H. Rob.	J.B. Bringel 968	Brazil	Goiás	UB	NS	NS	KP454697	KP454244	KP454835	KP454960	KP454119
Mikaniinae	Mikania luetzelburgii Mattf.	M.D. de Moraes 723	Brazil	Bahia	TEX	KP454393	KP454542	KP454698	KP454245	KP454836	KP454961	KP454120
Mikaniinae	Mikania microcephala DC.	J.B. Bringel 1004	Brazil	Distrito Federal	TEX	NS	NS	KP454699	KP454246	KP454837	KP454962	KP454121
Mikaniinae	Mikania palustris (Gardner) R.M. King & H. Rob.	J.B. Bringel 951	Brazil	Goiás	UB	KP454394	KP454543	NS	KP454247	KP454838	KP454963	KP454122
Mikaniinae	Mikania thapsoides DC.	J.L. Panero & B. Crozier 8525	Argentina	Misiones	TENN	KP454395	KP454544	KP454700	KP454248	KP454839	KP454964	KP454123
Ayapaninae	Monogereion carajensis G.M. Barroso & R.M. King	C.R. Sperling 5596	Brazil	Pará	MICH	KP454396	KP454545	NS	NS	NS	KP454965	KP454124
Gyptidinae	Morithamnus crassus R.M. King, H. Rob. & G.M. Barroso	M.D. de Moraes 742	Brazil	Bahia	TEX	KP454397	KP454546	KP454701	KP454249	KP454840	KP454966	KP454125
Gyptidinae	Morithamnus ganophyllus (Mattf.) R.M. King & H. Rob.	S.C. Ferreira 375	Brazil	Bahia	HUEFS	KP454398	KP454547	KP454702	NS	NS	NS	NS
Critoniinae	Neocabreria malacophylla (Klatt) R.M. King & H. Rob.	M. Sobral 5951	Brazil	Rio Grande do Sul	NY	KP454399	KP454548	KP454703	KP454250	KP454841	KP454967	NS
Critoniinae	Neocabreria serrulata (DC.) R.M. King & H. Rob.	M.D. de Moraes 695	Brazil	Minas Gerais	TEX	KP454400	KP454549	KP454704	KP454251	KP454842	KP454968	KP454126
Critoniinae	Ophryosporus freyreysii (Thunb.) Baker	R. Harley 25330	Brazil	Bahia	UB	KP454401	KP454550	KP454705	KP454252	KP454843	KP454969	NS
Critoniinae	Ophryosporus peruvianus (J.F. Gmel.) R.M. King & H. Rob.	J.L. Panero 875	Peru	Cajamarca	TENN	KP454402	KP454551	KP454706	KP454253	NS	KP454970	KP454127
Critoniinae	Ophryosporus triangularis Meyen	J.L. Panero & B. Crozier 8434A	Chile	Coquimbo	TENN	KP454403	KP454552	KP454707	KP454254	KP454844	KP454971	KP454128
Ayapaninae	Parapiqueria cavalcantei R.M. King & H. Rob.	P.L. Viana 5237	Brazil	Pará	BHCB	Fernandes (2014)	Fernandes (2014)	NS	NS	NS	NS	NS
Alomiinae	Planaltoa lychnophorioides G.M. Barroso	B. Gates & Eastbrook 205	Brazil	Goiás	MICH	KP454404	KP454553	KP454708	KP454255	KP454845	NS	NS
Alomiinae	Planaltoa salviifolia Taub.	J.B. Bringel 799	Brazil	Goiás	UB	KP454405	KP454554	KP454709	KP454256	KP454846	KP454972	KP454129
Trichogoniinae	Platypodanthera melissifolia (DC.) R.M. King & H. Rob. ssp. melissifolia	V.L. Rivera 125	Brazil	Bahia	TEX	KP454406	KP454555	KP454710	KP454257	KP454847	KP454973	KP454130
Trichogoniinae	Platypodanthera melissifolia (DC.) R.M. King & H. Rob. ssp. riocontensis	V.L. Rivera 137	Brazil	Bahia	TEX	KP454407	KP454556	KP454711	KP454258	KP454848	KP454974	KP454131
Praxelinae	Praxeliopsis mattogrossensis G.M. Barroso	J.E. Faria 3493	Brazil	Mato Grosso	UB	in submission	in submission	NS	NS	NS	in submission	in submission
Praxelinae	Praxelis clematidea R.M. King & H. Rob.	V.L. Rivera 146	Brazil	Goiás	TEX	KP454408	KP454557	NS	KP454259	KP454849	KP454975	KP454132
Praxelinae	Praxelis diffusa (Rick.) Pruski	R.N Ribeiro 604	Brazil	Goiás	UB	in submission	in submission	NS	NS	NS	in submission	in submission
Praxelinae	Praxelis kleinioides (Kunth) Sch. Bip.	N.P. Lopes 132	Brazil	Minas Gerais	TENN	NS	NS	NS	KP454261	KP454851	KP454977	KP454134
Praxelinae	Praxelis kleinioides (Kunth) Sch. Bip.	R.N. Ribeiro 611	Brazil	Goiás	UB	in submission	in submission	NS	NS	NS	NS	NS
Gyptidinae	Prolobus nitidulus (Baker) R. M. King & H. Rob.	S.A. Mori 14059	Brazil	Bahia	NY	KP454410	NS	KP454713	KP454262	KP454852	NS	NS
Alomiinae	Pseudobrickellia angustissima (Spreng. ex Baker) R.M. King & H. Rob.	J.E. Faria 1903	Brazil	Bahia	UB	KP454411	KP454559	KP454714	KP454263	KP454853	KP454978	KP454135
Alomiinae	Pseudobrickellia brasiliensis (Spreng.) R.M. King & H. Rob.	V.L. Rivera 89	Brazil	Goiás	TEX	KP454412	KP454560	KP454715	KP454264	KP454854	KP454979	NS
Ageratinae	Radlkoferotoma cistifolium (Less.) Kuntze	M.D. de Moraes 813	Brazil	Paraná	TEX	KP454413	KP454561	KP454716	KP454265	KP454855	KP454980	KP454136
Disynaphinae	Raulinoreitzia crenulata (Spreng.) R.M. King & H. Rob.	M.D. de Moraes 721	Brazil	São Paulo	TEX	KP454414	KP454562	KP454717	KP454266	KP454856	KP454981	KP454137
Disynaphinae	Raulinoreitzia leptophlebia (B.L. Rob.) R.M. King & H. Rob.	J. Cordeiro 1420	Brazil	Paraná	NY	KP454415	KP454563	KP454718	KP454267	KP454857	KP454982	NS
Disynaphinae	Raulinoreitzia tremula (Hook. & Arn.) R.M. King & H. Rob.	J.B. Bringel 815	Brazil	Goiás	UB	KP454416	KP454564	KP454719	KP454268	KP454858	KP454983	KP454138
Ageratinae	Scherya bahiensis R.M. King & H. Rob.	A. Rapini 972	Brazil	Bahia	HUEFS	KP454417	KP454565	KP454720	KP454269	KP454859	KP454984	KP454139
Gyptidinae	Semiria viscosa D.J.N. Hind	S.C. Ferreira 365	Brazil	Bahia	TEX	KP454418	KP454566	KP454721	NS	NS	NS	NS
Critoniinae	Sphaereupatorium scandens (Gardner) R.M. King & H. Rob.	M. Hopkins 77	Bolivia	Santa Cruz	NY	NS	NS	KP454722	NS	NS	NS	NS
Piqueriinae	Stevia aschenborniana Sch. Bip.	J.L. Panero & E.E. Schilling 8864	Mexico	Guerrero	TEX	KP454419	KP454567	KP454723	NS	NS	KP454985	NS
Piqueriinae	Stevia crenulata Baker	J.B. Bringel 848	Brazil	Distrito Federal	UB	KP454420	KP454568	KP454724	KP454270	KP454860	KP454986	KP454140
Piqueriinae	Stevia plummerae A. Gray	Schilling NM7	USA	cultivated	TENN	KP454421	KP454569	KP454725	KP454271	KP454861	KP454987	KP454141
Piqueriinae	Stevia resinosa Gardner	J.B. Bringel 990	Brazil	Goiás	UB	KP454422	KP454570	KP454726	KP454272	KP454862	KP454988	KP454142
Piqueriinae	Stevia veronicae DC.	J.B. Bringel 779	Brazil	Goiás	UB	KP454423	KP454571	KP454727	KP454273	KP454863	KP454989	KP454143
Critoniinae	Steyermarkina pyrifolia (DC.) R.M. King & H. Rob.	A.M. de Carvalho 4598	Brazil	Bahia	NY	KP454424	KP454572	KP454728	KP454274	KP454864	KP454990	NS
Eupatoriinae	Stomatanthes dyctiophyllus (DC. ) H. Rob.	M.D. de Moraes 768	Brazil	Minas Gerais	TEX	AF177787	AF177827	KP454729	NS	NS	KP454991	KP454144
Eupatoriinae	Stomatanthes hirsutus H. Rob.	V.L. Rivera 147	Brazil	Goiás	TEX	KP454425	KP454573	KP454730	KP454275	KP454865	KP454992	KP454145
Eupatoriinae	Stomatanthes pinnatipartitus (Sch. Bip. ex Baker) R.M. King & H. Rob.	S.C. Ferreira 424	Brazil	Minas Gerais	TEX	KP454426	KP454574	KP454731	KP454276	KP454866	KP454993	KP454146
Eupatoriinae	Stomatanthes trigonus (Gardner) H. Rob.	V.L. Rivera 95	Brazil	Distrito Federal	TEX	KP454427	KP454575	KP454732	NS	NS	KP454994	KP454147
Gyptidinae	Stylotrichium rotundifolium Mattf.	M.D. de Moraes 746	Brazil	Bahia	TEX	KP454428	KP454576	KP454733	KP454277	KP454867	KP454995	KP454148
Gyptidinae	Stylotrichium sucrei R.M. King & H. Rob.	S.C. Ferreira 350	Brazil	Bahia	HUEFS	NS	NS	KP454734	NS	NS	NS	NS
Disynaphinae	Symphyopappus brasiliensis (Gardner) R.M. King & H. Rob.	J.B. Bringel 908	Brazil	Minas Gerais	UB	KP454429	KP454577	KP454735	KP454278	KP454868	KP454996	KP454149
Disynaphinae	Symphyopappus compressus (Gardner) B. L. Rob.	V.L. Rivera 133	Brazil	Bahia	TEX	KP454430	KP454578	KP454736	KP454279	KP454869	NS	NS
Disynaphinae	Symphyopappus decussatus Turcz.	J.E. Faria 2212	Brazil	Minas Gerais	TEX	KP454431	KP454579	KP454737	KP454280	KP454870	KP454997	KP454150
Disynaphinae	Symphyopappus itatiayensis (Hieron.) R.M. King & H. Rob.	C. Proença 4045	Brazil	Rio de Janeiro	UB	KP454432	KP454580	KP454738	KP454281	KP454871	NS	NS
Disynaphinae	Symphyopappus reticulatus Baker	C.M. Sakuragui CFCR 15197	Brazil	Minas Gerais	NY	KP454433	KP454581	KP454739	KP454282	KP454872	NS	NS
Ageratinae	Teixeiranthus foliosus (Gardner) R.M. King & H. Rob.	Pohl s/n	Brazil	Minas Gerais	NY	KP454434	KP454582	KP454740	KP454283	KP454873	KP454998	NS
Trichogoniinae	Trichogonia campestris Gardner	J.B. Bringel 740	Brazil	Tocantins	UB	KP454435	KP454583	KP454741	KP454284	KP454874	KP454999	KP454151
Trichogoniinae	Trichogonia cinerea (Gardner) R.M. King & H. Rob.	V.L. Rivera 83	Brazil	Goiás	TEX	KP454436	KP454584	KP454742	KP454285	KP454875	KP455000	KP454152
Trichogoniinae	Trichogonia eupatorioides (Gardner) R.M. King & H. Rob.	M.D. de Moraes 676	Brazil	Minas Gerais	TEX	KP454437	KP454585	KP454743	NS	NS	KP455001	KP454153
Trichogoniinae	Trichogonia grazielae R.M. King & H. Rob.	V.L. Rivera 149	Brazil	Goiás	TEX	KP454438	KP454586	KP454744	KP454286	KP454876	KP455002	KP454154
Trichogoniinae	Trichogonia hirtiflora (DC.) Sch. Bip. ex Baker	J.E. Faria 2213	Brazil	Minas Gerais	TEX	KP454439	KP454587	KP454745	KP454287	KP454877	KP455003	KP454155
Trichogoniinae	Trichogonia prancei G.M. Barroso	V.L. Rivera 90	Brazil	Goiás	TEX	KP454440	KP454588	KP454746	KP454288	KP454878	KP455004	KP454156
Trichogoniinae	Trichogonia salviifolia Gardner	V.L. Rivera 127	Brazil	Bahia	TEX	KP454441	KP454589	KP454747	KP454289	NS	KP455005	NS
Trichogoniinae	Trichogonia tombadorensis R.M. King & H. Rob.	V.L. Rivera 217	Brazil	Bahia	TEX	KP454442	KP454590	KP454748	KP454290	KP454879	KP455006	KP454157
Trichogoniinae	Trichogonia villosa Sch. Bip. ex Baker	J.E. Faria 2234	Brazil	Minas Gerais	TEX	KP454443	KP454591	KP454749	KP454291	KP454880	KP455007	KP454158
Trichogoniinae	Trichogoniopsis adenantha (DC.) R.M. King & H. Rob.	M.D. de Moraes 764	Brazil	São Paulo	TEX	KP454444	KP454592	KP454750	KP454292	KP454881	KP455008	KP454159
Trichogoniinae	Trichogoniopsis morii R.M. King & H. Rob.	N. Hind 3597	Brazil	Bahia	HUEFS	KP454445	KP454593	KP454751	NS	NS	NS	NS
Gyptidinae	Urolepis hecatantha (DC.) R.M. King & H. Rob.	J.L. Panero & B. Crozier 8493	Argentina	Jujuy	TENN	KP454446	KP454594	KP454752	KP454293	KP454882	KP455009	NS
Gyptidinae	Vittetia orbiculata (DC.) R.M. King & H. Rob.	J. Marzinek 41	Brazil	São Paulo	HUEFS	KP901187.1	KP901187.1	NS	NS	NS	NS	NS
	Species names in bold = new sequences
	herb. = herbarium; ref. = reference
	Note 1: NS = no sequence available
	Note 2: vouchers with authors followed by a year in parenthesis are unpublished sequences donated by the authors; see Literature cited for complete references
